# Supplementary material for: Global declines in coral reef calcium carbonate production under ocean acidification and warming
Source: PubMed Central journal article supplement — Proc Natl Acad Sci U S A. 2021 May 10;118(21):e2015265118. doi: 10.1073/pnas.2015265118 (PMC8166140; doi:10.1073/pnas.2015265118), 2021-05-10
Supplement: pnas.2015265118.sapp.pdf [file pnas.2015265118.sapp.pdf]

1 **Supplementary Information for**

2

3 Global declines in coral reef calcium carbonate production under ocean acidification and  
4 warming

5

6 Christopher E. Cornwall<sup>a,b,c,1,\*</sup>, Steeve Comeau<sup>d,b,c,1</sup>, Niklas A. Kornder<sup>e,f</sup>,  
7 Chris T. Perry<sup>g</sup>, Ruben Van Hooidonk<sup>h,i</sup>, Thomas M. DeCarlo<sup>b,c,j</sup>, Morgan S. Pratchett<sup>k</sup>,  
8 Kristen D. Anderson<sup>k,l</sup>, Nicola Browne<sup>m</sup>, Robert Carpenter<sup>n</sup>, Guillermo Diaz-Pulido<sup>o</sup>, Juan P.  
9 D’Olivo<sup>b,c,†</sup>, Steve Doo<sup>n</sup>, Joana Figueiredo<sup>f</sup>, Sofia A.V. Fortunato<sup>p</sup>, Emma Kennedy<sup>o,q</sup>,  
10 Coulson A. Lantz<sup>r</sup>, Malcolm T. McCulloch<sup>b,c</sup>, Manuel González-Rivero<sup>q,1</sup>, Verena  
11 Schoepf<sup>b,c,e</sup>, Scott G. Smithers<sup>p</sup>, Ryan Lowe<sup>b,c</sup>

12

13 <sup>a</sup>School of Biological Sciences, Victoria University of Wellington, Kelburn 6140,  
14 Wellington, New Zealand.

15 <sup>b</sup>Oceans Graduate School and Oceans Institute, The University of Western Australia, 35  
16 Stirling Highway, Crawley 6009, Western Australia, Australia.

17 <sup>c</sup>ARC Centre of Excellence for Coral Reef Studies, 35 Stirling Highway, Crawley 6009,  
18 Western Australia, Australia.

19 <sup>d</sup>Sorbonne Université, CNRS-INSU, Laboratoire d’Océanographie de Villefranche, 181  
20 chemin du Lazaret, F–06230 Villefranche-sur-mer, France.

21 <sup>e</sup>Department of Freshwater and Marine Ecology, Institute for Biodiversity and Ecosystem  
22 Dynamics, University of Amsterdam, P.O. Box 94240, 1090 GE, Amsterdam, The  
23 Netherlands.

24 <sup>f</sup>Halmos College of Natural Sciences and Oceanography, Nova Southeastern University, 8000  
25 North Ocean Drive, Dania Beach, FL 33004, USA.

26

27 <sup>g</sup>Geography, College of Life and Environmental Sciences, University of Exeter, Exeter, UK.

28 <sup>h</sup>Atlantic Oceanographic and Meteorological Laboratory, National Oceanic and Atmospheric  
29 Administration, Miami, FL, United States.

30 <sup>i</sup>Cooperative Institute for Marine and Atmospheric Studies, Rosenstiel School of Marine and  
31 Atmospheric Science, University of Miami, 4600 Rickenbacker Causeway, Miami, FL  
32 33149, USA.

33 <sup>j</sup>College of Natural and Computational Sciences, Hawai'i Pacific University, Honolulu,  
34 Hawai'i, USA

35 <sup>k</sup>ARC Centre of Excellence for Coral Reef Studies, James Cook University, Townsville,  
36 Queensland, 4811, Australia.

37 <sup>l</sup>Australian Institute of Marine Science, Townsville, Queensland, Australia.

38 <sup>m</sup>School of Molecular and Life Sciences, Curtin University, Bentley, Western Australia 6102,  
39 Australia.

40 <sup>n</sup>California State University, Northridge, CA, USA.

41 <sup>o</sup>School of Environment and Science, and Australian Rivers Institute, Griffith University,  
42 Brisbane, Queensland, Australia.

43 <sup>p</sup>College of Science and Engineering, James Cook University, Queensland, Australia.

44 <sup>q</sup>Global Change Institute, University of Queensland, Brisbane, Queensland, Australia.

45 <sup>r</sup>Centre for Coastal Biogeochemistry, School of Environment, Science, and Engineering,  
46 Southern Cross University, Lismore, Australia.

47 <sup>1</sup>CEC and SC contributed equally

48 <sup>‡</sup>Current address: Department of Geological Sciences, Freie Universität Berlin, Malteserstr.  
49 74-100/D, 12249 Berlin, Germany

50 \* Christopher E. Cornwall

51 **Email:** [Christopher.cornwall@vuw.ac.nz](mailto:Christopher.cornwall@vuw.ac.nz)

52  
53

54 **This PDF file includes:**

55  
56       Figures S1 to S7  
57       Table S1  
58       Legends for Datasets S1 to S2  
59       SI References

60  
61 **Other supplementary materials for this manuscript include the following:**

62  
63       Datasets S1 to S2  
64  
65

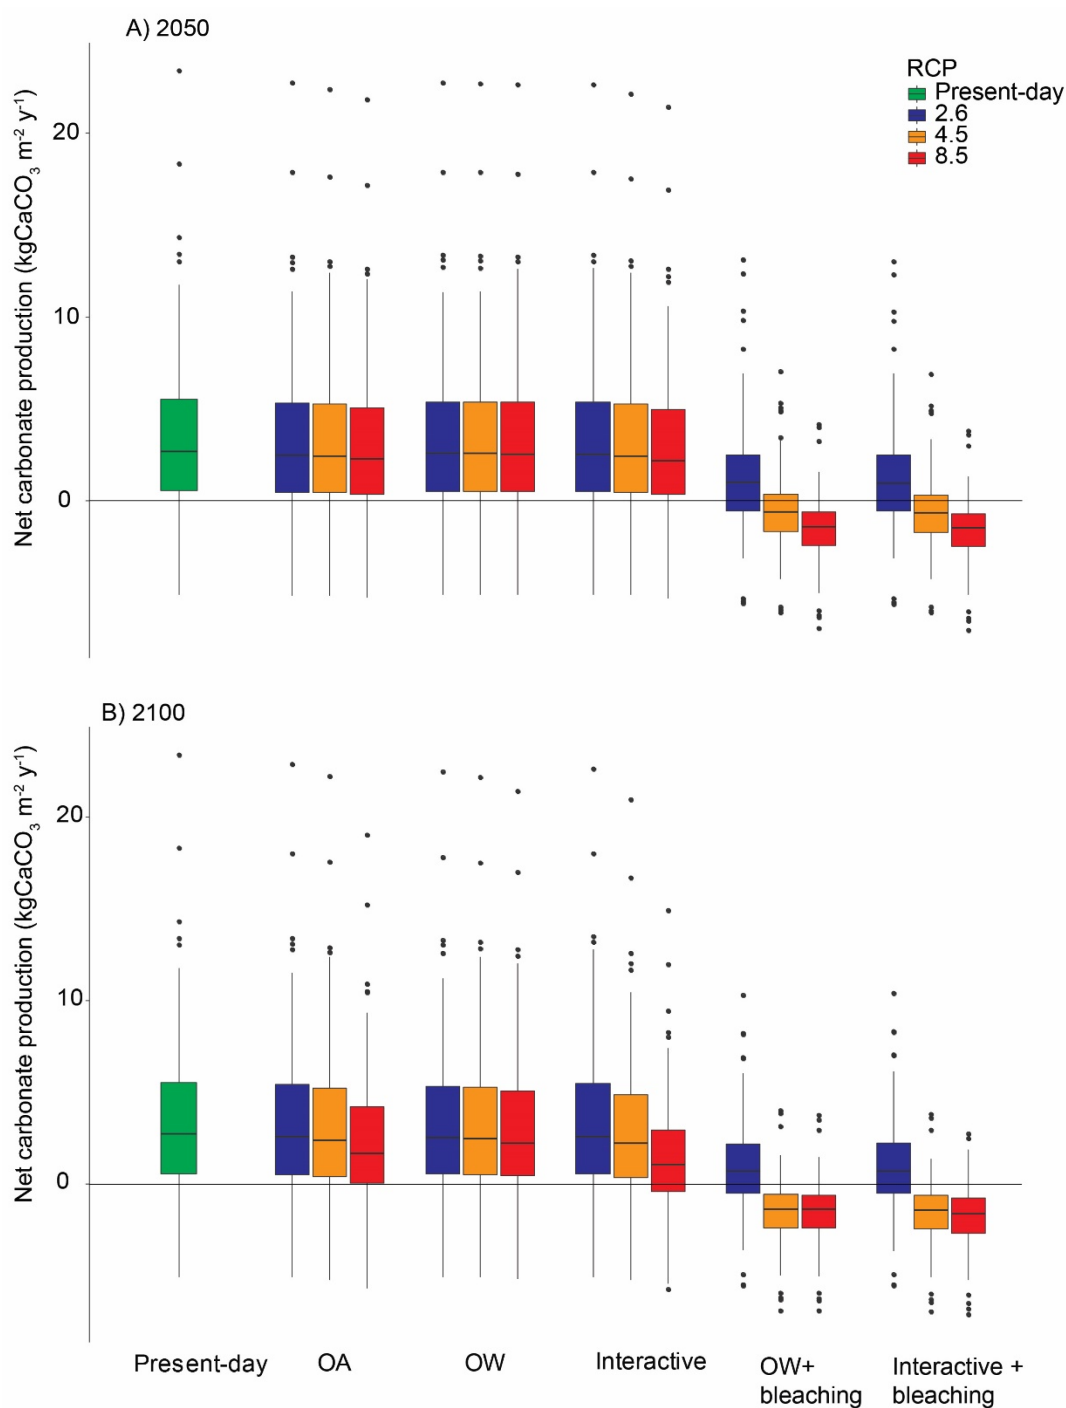

66

67 **Fig. S1.** Net carbonate production (kg CaCO<sub>3</sub> m<sup>-2</sup> y<sup>-1</sup>) at present-day and under 15 additional  
 68 scenarios: ocean acidification (OA), ocean warming (OW) the interaction between OA and  
 69 OW, and examples of the same scenarios with reduced coral cover due to mass coral  
 70 bleaching, under three emissions scenarios (RCP2.6, 4.5 and 8.5) by 2050 and 2100. Median  
 71 responses of all 199 sites on 183 reefs. Quartiles, 95% whiskers, and outliers presented.

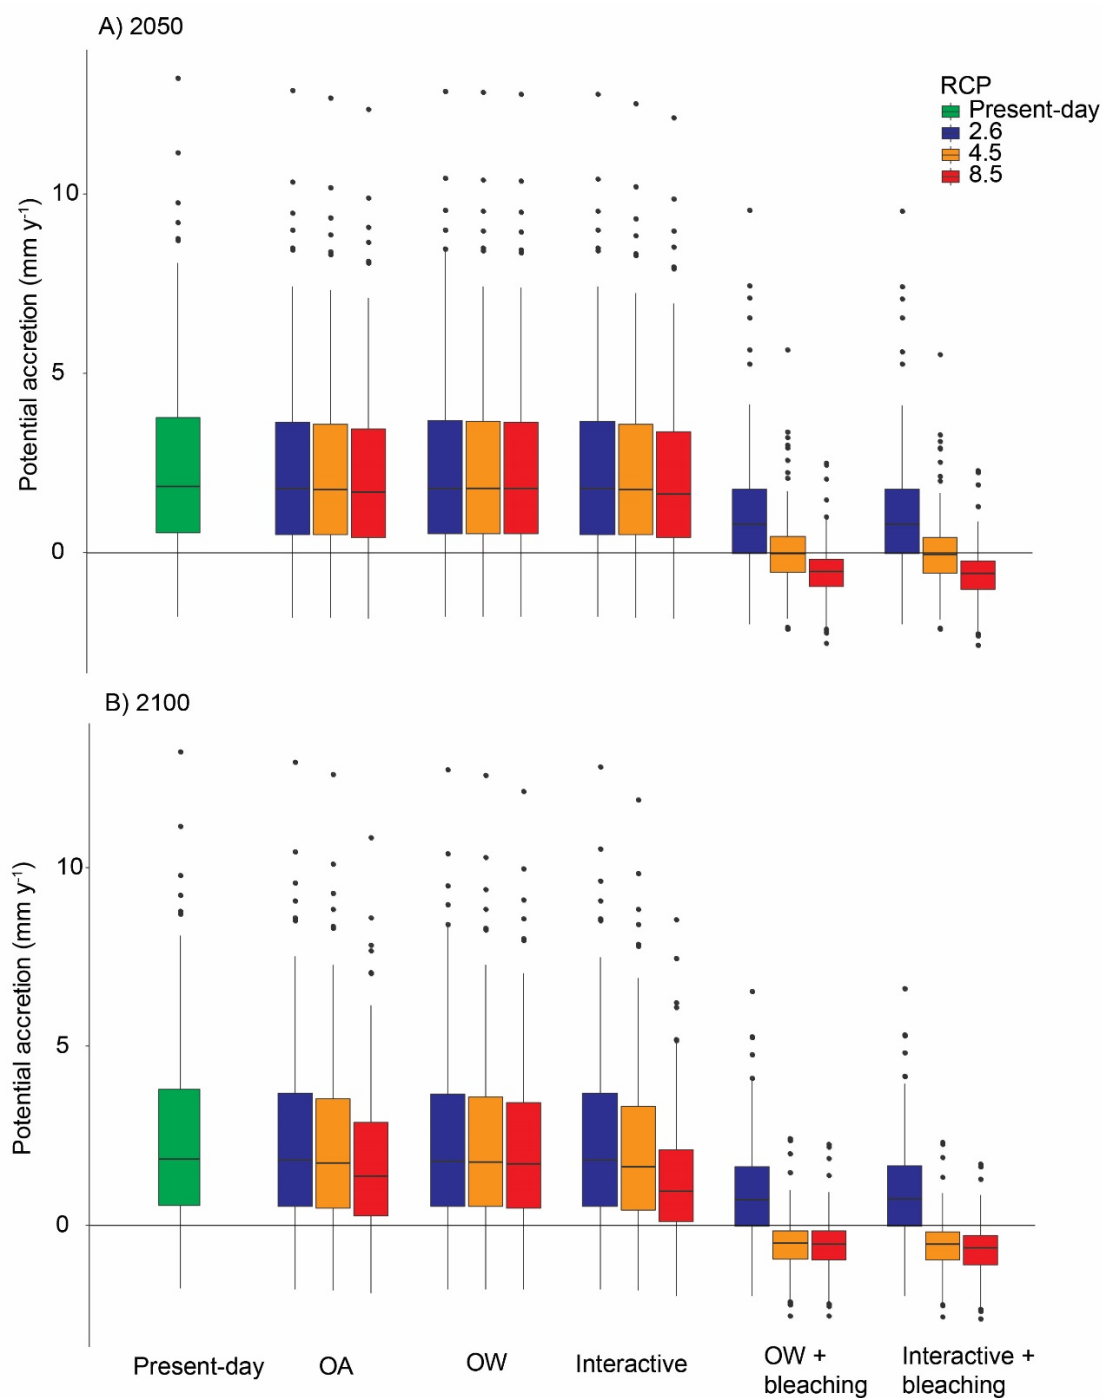

72

73 **Fig. S2.** Reef accretion rates ( $\text{mm y}^{-1}$ ) at present-day and under 15 additional scenarios: ocean  
 74 acidification (OA), ocean warming (OW) the interaction between OA and OW, and examples  
 75 of the same scenarios with reduced coral cover due to mass coral bleaching, under three  
 76 emissions scenarios (RCP2.6, 4.5 and 8.5) by 2050 and 2100. Median responses of all 199  
 77 sites on 183 reefs. Quartiles, 95% whiskers, and outliers presented.

78

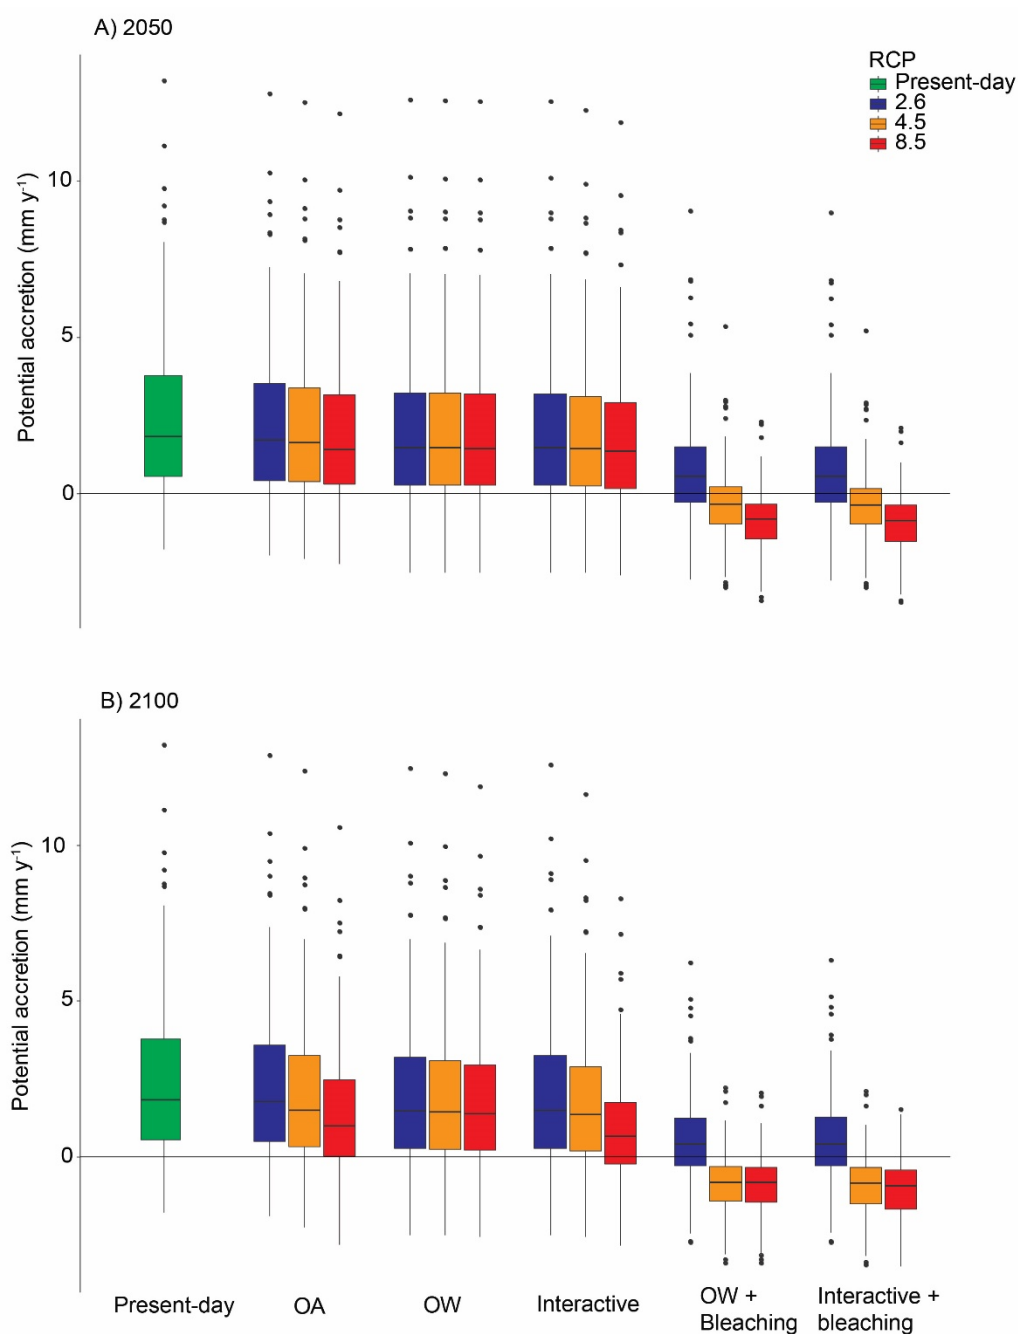

79

80 **Fig. S3.** Reef accretion rates (mm y<sup>-1</sup>) at present-day and under 15 additional scenarios that  
 81 include sediment dissolution rates, assuming equal dissolution on reefs as measured in  
 82 lagoons: ocean acidification (OA), ocean warming (OW) the interaction between OA and  
 83 OW, and examples of the same scenarios with reduced coral cover due to mass coral  
 84 bleaching, under three emissions scenarios (RCP2.6, 4.5 and 8.5) by 2050 and 2100. Median  
 85 responses of all 199 sites on 183 reefs. Quartiles, 95% whiskers, and outliers presented.  
 86

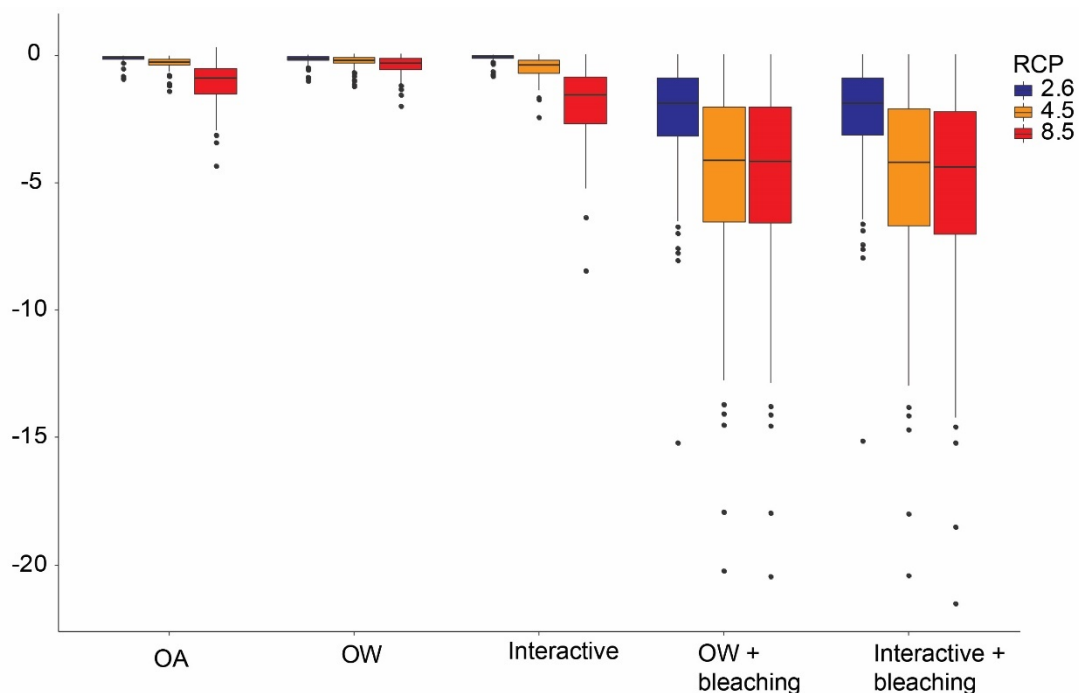

87  
88

89 **Fig. S4.** Declines in net carbonate production (kg CaCO<sub>3</sub> m<sup>-2</sup> y<sup>-1</sup>) by 2100, projected  
90 including solely metabolic effects on calcification and bioerosion processes (ocean  
91 acidification [OA], ocean warming [OW], and their interactive effects [interactive]), as well  
92 as the effects of mass coral bleaching (under ocean warming [OW+ bleaching] and the  
93 interactive effects of ocean warming and acidification [Interactive + bleaching]). All  
94 scenarios are displayed under RCP2.6, 4.5 and 8.5. Medians, 75% quartiles, 95% whiskers  
95 and outliers displayed.

96

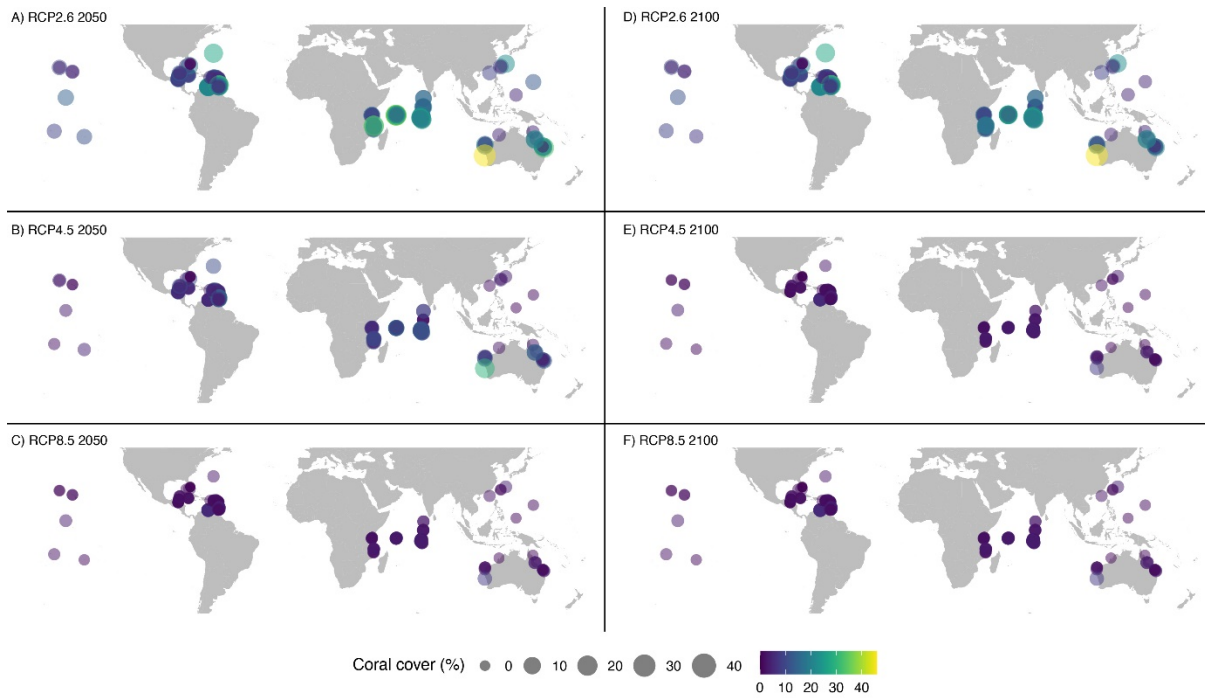

97  
 98  
 99  
 100  
 101  
 102

**Fig. S5:** Coral cover at our 183 reefs we use in our model by 2050 and 2100 under projections of interactive effects of ocean acidification, warming and mass coral bleaching by 2050 at A) RCP2.6, B) RCP4.5 C) RCP8.5 and by 2100 under D) RCP2.6, E) RCP4.5, F) RCP8.5.

103

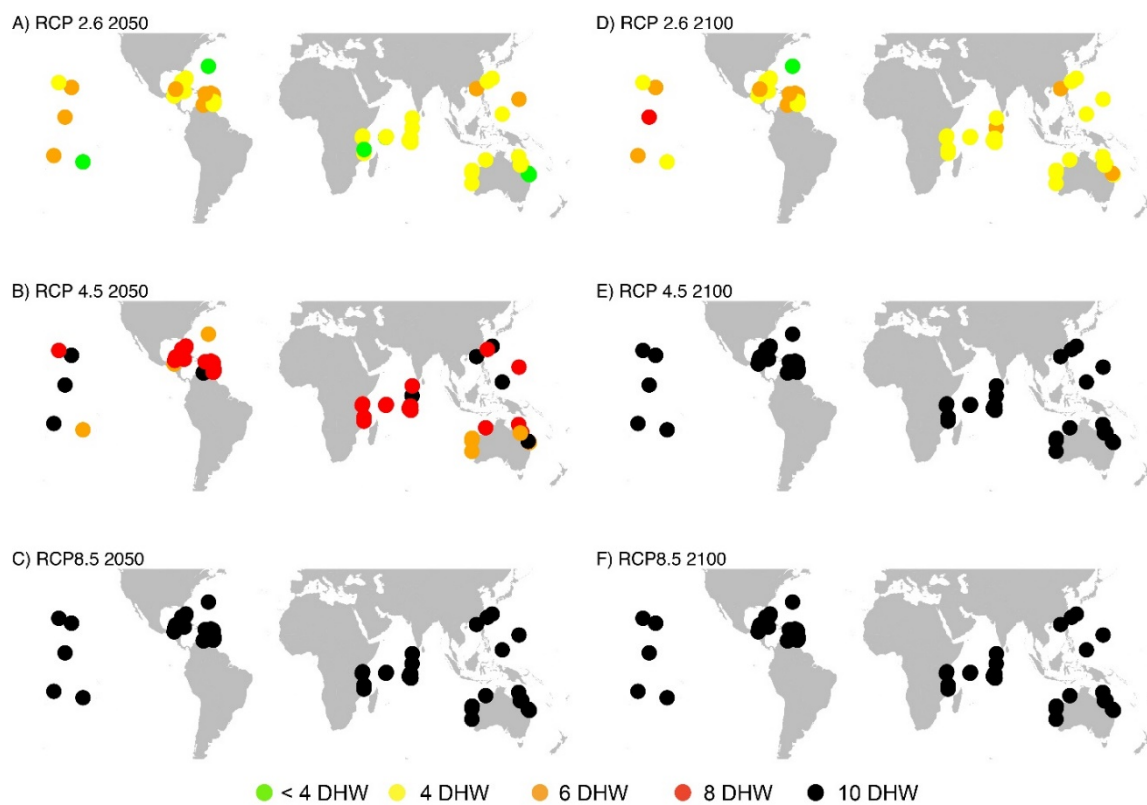

104

105 **Fig. S6.** Frequency of twice-decade Degree Heating Weeks (DHW) events predicted at our  
 106 183 reefs we use in our model by 2050 and 2100. A) present-day, and projections of  
 107 interactive effects of ocean acidification, warming and mass coral bleaching by 2050 at B)  
 108 RCP2.6, C) RCP4.5 D) RCP8.5 and by 2100 under F) RCP2.6, G) RCP4.5, H) RCP8.5.  
 109



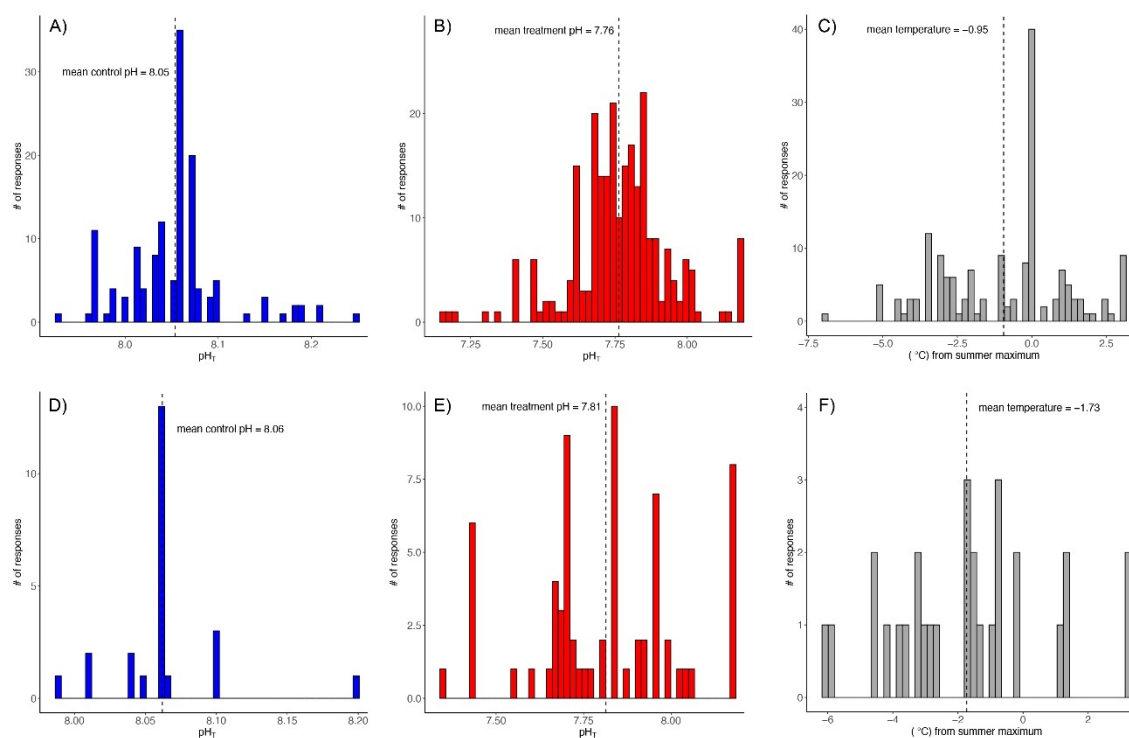

110

111 **Fig. S7.** Frequency of responses measured: A) control coral responses to  $p\text{CO}_2$ , B)  
 112 “treatment” coral responses to pH, C) coral responses to temperature from the summer  
 113 maximum at collection location, C) control coralline algal responses to pH, E) “treatment”  
 114 coralline algal responses to pH, F) coralline algal responses to temperature from the summer  
 115 maximum at collection location.

116

117 **Table S1.** List of studies used to determine the response of calcifying coral reef taxa to ocean  
 118 warming, acidification, and their interaction. Also listed are studies with *in situ*, or similar  
 119 calcification based on hydrochemical methods, used to inform reef-scale responses.

| Reference                      | Use of data here*                       | Scenario, for meta-analysis | Location, for <i>in situ</i> data only |
|--------------------------------|-----------------------------------------|-----------------------------|----------------------------------------|
| Achlatis et al. (2017)(1)      | Bioerosion                              | OA and OW                   |                                        |
| Albright and Langdon (2011)(2) | Coral calcification                     | OA                          |                                        |
| Albright et al. (2010)(3)      | Coral calcification                     | OA                          |                                        |
| Albright et al. (2013)(4)      | Net carbonate production                |                             | Davies Reef                            |
| Albright et al. (2015)(5)      | Net carbonate production                |                             | Heron Island                           |
| Anderson et al. (2017)(6)      | Coral calcification, <i>in situ</i>     |                             | Great Barrier Reef                     |
| Anlauf et al. (2011)(7)        | Coral calcification                     | OA and OW                   |                                        |
| Anthony et al. (2008)(8)       | Coralline algal and coral calcification | OA and OW                   |                                        |
| Atkinson and Grigg (1984)(9)   | Net carbonate production                |                             | French Frigate Shoals                  |
| Bahr et al. (2016)(10)         | Coral calcification                     | OA and OW                   |                                        |

|                                 |                                                  |           |                                        |
|---------------------------------|--------------------------------------------------|-----------|----------------------------------------|
| Bedwell-Ivers et al. (2016)(11) | Coral calcification                              | OA        |                                        |
| Béraud et al. (2014)(12)        | Coral calcification                              | OW        |                                        |
| Biscéré et al. (2015)(13)       | Coral calcification                              | OA        |                                        |
| Brien et al. (2015)(14)         | Coral calcification                              | OA        |                                        |
| Browne et al. (2013)(15)        | Net carbonate production                         |           | Middle Reef and Paluma Shoals          |
| Castillo et al. (2014)(16)      | Coral calcification                              | OA and OW |                                        |
| Chauvin et al. (2011)(17)       | Coral calcification                              | OA        |                                        |
| Chazottes et al. (1995)(18)     | Bioerosion, present day                          |           | Moorea                                 |
| Chisholm et al. (2000)(19)      | Coralline algal calcification, <i>in situ</i>    |           | Lizard Island                          |
| Cohen et al. (2017)(20)         | Coral calcification                              | OA        |                                        |
| Comeau et al. (2013)(21)        | Coral calcification                              | OA        |                                        |
| Comeau et al. (2013)(22)        | Coralline algal and coral calcification          | OA        | Pacific (non GBR sites)                |
| Comeau et al. (2014)(23)        | Coralline algal and coral calcification          | OA and OW |                                        |
| Comeau et al. (2014)(24)        | Coralline algal and coral calcification          | OA        | Pacific (non GBR sites)                |
| Comeau et al. (2014)(25)        | Coralline algal and coral calcification          | OA        | Hawaii and French Frigate Shoals sites |
| Comeau et al. (2015)(26)        | Sediment dissolution                             | OA        |                                        |
| Comeau et al. (2016)(27)        | Coralline algal and coral calcification,         | OA and OW |                                        |
| Comeau et al. In SI data 2      | Net carbonate production                         |           | Tallon Island                          |
| Cornwall et al. (2018)(28)      | Coralline algal and coral calcification          |           | OA                                     |
| Cornwall et al. In SI data 2    | Coralline algal and coral calcification          |           | Tallon Island                          |
| Cornwall et al. In SI data 2    | Coralline algal calcification                    |           | Ningaloo                               |
| Courtney et al. (2016)(29)      | Net carbonate production and coral calcification |           | Bermuda                                |
| Cyronak et al. (2013)(30)       | Sediment dissolution                             | OA        |                                        |
| Davies and Hutchings (1983)(31) | Bioerosion, present day                          |           | Lizard Island                          |
| DeCarlo et al. (2015)(32)       | Bioerosion, present day                          |           |                                        |
| DeCarlo et al. (2017)(33)       | Net carbonate production                         |           | Dongsha Atoll                          |
| Doo and Carpenter In SI data 2  | Net carbonate production                         |           | Moorea                                 |
| Doropolous et al. (2012)(34)    | Coralline algal calcification                    | OA        |                                        |

|                                  |                               |           |                    |
|----------------------------------|-------------------------------|-----------|--------------------|
| Doropolous et al. (2012)(35)     | Coral calcification           | OA        |                    |
| Drenkard et al. (2013)(36)       | Coral calcification           | OA        |                    |
| Dufault et al. (2012)(37)        | Coral calcification           | OA        |                    |
| Dufault et al. (2013)(38)        | Coral calcification           | OA        |                    |
| Edinger et al. (2000)(39)        | Bioerosion, present day       |           |                    |
| Edmunds (2005)(40)               | Coral calcification           | OW        |                    |
| Edmunds (2011)(41)               | Coral calcification           | OA        |                    |
| Edmunds and Yavid (2017)(42)     | Coral calcification           | OA        |                    |
| Edmunds et al. (2011)(43)        | Coral calcification           | OW        |                    |
| Edmunds et al. (2012)(44)        | Coral calcification           | OA and OW |                    |
| Enochs et al. (2014)(45)         | Coral calcification           | OA        |                    |
| Enochs et al. (2015)(46)         | Bioerosion                    | OA        |                    |
| Enochs et al. (2016)(47)         | Bioerosion, present day       |           |                    |
| Evensen and Edmunds (2017)(48)   | Coral calcification           | OA        |                    |
| Evensen et al. (2015)(49)        | Coral calcification           | OA        |                    |
| Eyre et al. (2018)(50)           | Sediment dissolution          | OA        |                    |
| Falter et al. (2012)(51)         | Net carbonate production      |           | Ningaloo           |
| Fang et al. (2013)(52)           | Bioerosion                    | OA and OW |                    |
| Foster et al. (2014)(53)         | Coral calcification           |           | Ningaloo           |
| Foster et al. (2015)(54)         | Coral calcification           | OW        |                    |
| Gao and Zheng (2010)(55)         | Coralline algal calcification | OA        |                    |
| Grottoli et al. (2014)(56)       | Coral calcification           | OW        |                    |
| Hamylton (2014)(57)              | Net carbonate production      |           | Lady Elliot Island |
| Hoadley et al. (2016)(58)        | Coral calcification           | OA and OW |                    |
| Huang et al. (2014)(59)          | Coral calcification           | OA        |                    |
| Houlbrèque et al. (2012)(60)     | Coral calcification           | OA        |                    |
| Houlbrèque et al. (2015)(61)     | Coral calcification           | OA        |                    |
| Hovarth et al. (2016)(62)        | Coral calcification           | OA and OW |                    |
| Hutchings et al. (1995)(63)      | Bioerosion, present day       |           | Lizard Island      |
| Iguchi et al. (2012)(64)         | Coral calcification           | OA        |                    |
| Iguchi et al. (2014)(65)         | Coral calcification           | OA        |                    |
| Inoue et al. (2011)(66)          | Coral calcification           | OA and OW |                    |
| Johnson and Carpenter (2012)(67) | Coralline algal calcification | OA and OW |                    |
| Johnson et al. (2014)(68)        | Coralline algal calcification | OA        |                    |
| Johnson et al. (2014)(69)        | Coralline algal calcification | OA        |                    |
| Jokiel et al. (2008)(70)         | Coralline algal calcification | OA        |                    |

|                                      |                                                            |           |                             |
|--------------------------------------|------------------------------------------------------------|-----------|-----------------------------|
| Kaniewska et al. (2012)(71)          | Coral calcification                                        | OA        |                             |
| Kato et al. (2014)(72)               | Coralline algal calcification                              | OA        |                             |
| Kavousi et al. (2015)(73)            | Coral calcification                                        | OA and OW |                             |
| Kavousi et al. (2015)(74)            | Coral calcification                                        | OA        |                             |
| Kayanne et al. (2005)(75)            | Net carbonate production                                   |           | Palau and Shirado Reef      |
| Kennedy and Diaz-Pulido In SI data 2 | Coralline algal calcification, <i>in situ</i>              |           | Great Barrier Reef          |
| Kiene and Hutchings (1994)(76)       | Bioerosion, present day                                    |           | Lizard Island               |
| Krief et al. (2010)(77)              | Coral calcification                                        | OA        |                             |
| Koweek et al. (2015)(78)             | Net carbonate production                                   |           | Ofu                         |
| Koweek et al. (2015)(79)             | Net carbonate production                                   |           | Palmyra                     |
| Kuffner et al. (2008)(80)            | Coralline algal calcification                              | OA        |                             |
| Lantz et al. (2014)(81)              | Net carbonate production                                   |           | Hawaii                      |
| Lantz et al. (2017)(82)              | Sediment dissolution                                       | OW        |                             |
| Lantz et al. (2017)(83)              | Sediment dissolution                                       | OA        |                             |
| Lantz et al. (2018)(84)              | Sediment dissolution                                       | OW        |                             |
| Lenz and Edmunds (2017)(85)          | Coral calcification                                        | OA and OW |                             |
| Levas et al. (2013)(86)              | Coral calcification                                        | OW        |                             |
| Manzello et al. (2008)(87)           | Bioerosion, present day                                    |           |                             |
| Marubini and Atkinson (1999)(88)     | Coral calcification                                        | OA        |                             |
| Marubini et al. (2003)(89)           | Coral calcification                                        | OA        |                             |
| Muehllehner and Edmunds (2008)(90)   | Coral calcification                                        | OA and OW |                             |
| Nakamura et al. (2009)(91)           | Net carbonate production                                   |           | Shirado Reef                |
| Nakamura et al. (2017)(92)           | Coral calcification                                        | OA        |                             |
| Ohde and van Woesik (1999)(93)       | Net carbonate production                                   |           | Rukan-sho                   |
| Ohiki et al. (2013)(94)              | Coral calcification                                        | OA        |                             |
| Okazaki et al. (2017)(95)            | Coral calcification                                        | OA and OW |                             |
| Ordoñez et al. (2014)(96)            | Coralline algal calcification                              | OA        |                             |
| Pari et al. (2002)(97)               | Bioerosion, present day                                    |           | Moorea                      |
| Perez et al. (2018)(98)              | Net carbonate production                                   |           | Heron Island and Saipan     |
| Perry et al. (2018)(99)              | Bioerosion, coralline and coral calcification, present day |           | Atlantic and Indian oceans. |

|                                    |                                     |           |                                        |
|------------------------------------|-------------------------------------|-----------|----------------------------------------|
|                                    |                                     |           | See source paper for sites.            |
| Pettay et al. (2015)(100)          | Coral calcification                 | OW        |                                        |
| Putnam and Edmunds (2011)(101)     | Coral calcification                 | OW        |                                        |
| Renegar et al (2005)(102)          | Coral calcification                 | OA        |                                        |
| Reyes-Nivia et al. (2013)(103)     | Bioerosion                          | OA and OW |                                        |
| Reyes-Nivia et al. (2014)(104)     | Bioerosion                          | OA and OW |                                        |
| Reynaud et al. (2003)(105)         | Coral calcification                 | OA and OW |                                        |
| Reynaud et al. (2007)(106)         | Coral calcification                 | OW        |                                        |
| Ries et al. (2009)(107)            | Coralline algal calcification       | OA        |                                        |
| Rodrigues and Grottoli (2006)(108) | Coral calcification                 | OW        |                                        |
| Schoepf et al. (2013)(109)         | Coral calcification                 | OA and OW |                                        |
| Shaw et al. (2012)(110)            | Net carbonate production            |           | One Tree Island and Lady Elliot Island |
| Shaw et al. (2015)(111)            | Net carbonate production            |           | One Tree Island                        |
| Shaw et al. (2016)(112)            | Coral calcification                 | OA and OW |                                        |
| Short et al. (2014)(113)           | Coralline algal calcification       | OA        |                                        |
| Silbiger and Donohue (2015)(114)   | Bioerosion                          | OA and OW |                                        |
| Silverman et al. (2012)(115)       | Net carbonate production            |           | One Tree Island                        |
| Silverman et al. (2014)(116)       | Net carbonate production            |           | Lizard Island                          |
| Smith et al. (1981)(117)           | Coral calcification, <i>in situ</i> |           | Houtman Abrolos                        |
| Smith et al. (2007)(118)           | Coral calcification, <i>in situ</i> |           | Ofu                                    |
| Stubler and Peterson (2016)(119)   | Bioerosion                          | OA        |                                        |
| Stubler et al. (2015)(120)         | Bioerosion                          | OA        |                                        |
| Suzuki et al. (1995)(121)          | Net carbonate production            |           | Shiraho Reef                           |
| Takahashi and Kurihara (2013)(122) | Coral calcification                 | OA        |                                        |
| Tanaka et al. (2014)(123)          | Coral calcification                 | OA        |                                        |
| Tanaka et al. (2016)(124)          | Coralline algal calcification       | OW        |                                        |
| Towle et al. (2015)(125)           | Coral calcification                 | OA        |                                        |
| Towle et al. (2016)(126)           | Coral calcification                 | OA and OW |                                        |

|                                           |                               |           |               |
|-------------------------------------------|-------------------------------|-----------|---------------|
| Tribollet et al. (2002)(127)              | Bioerosion, present day       |           | Lizard Island |
| Tribollet and Golubic (2005)(128)         | Bioerosion, present day       |           | Lizard Island |
| Tribollet et al. (2009)(129)              | Bioerosion                    | OA        |               |
| Trnovsky et al. (2016)(130)               | Sediment dissolution          | OA and OW |               |
| Vasquez-Elizondo and Enriquez (2016)(131) | Coralline algal calcification | OA and OW |               |
| Venn et al. (2013)(132)                   | Coral calcification           | OA        |               |
| Vogel et al. (2015)(133)                  | Coral calcification           | OA and OW |               |
| Vogel et al. (2016)(134)                  | Coralline algal calcification | OA and OW |               |
| Webb et al. (2017)(135)                   | Bioerosion                    | OA and OW |               |
| Wijgerde et al. (2014)(136)               | Coral calcification           | OA        |               |
| Wisshak et al. (2012)(137)                | Bioerosion                    | OA and OW |               |

120  
121  
122  
123

Table S2: Definitions and terminology for methods measuring processes within carbonate budgets.

| <b>Method</b>                  | <b>Term</b>                                  | <b>Definition</b>                                                                                                                                                             | <b>Important References</b> |
|--------------------------------|----------------------------------------------|-------------------------------------------------------------------------------------------------------------------------------------------------------------------------------|-----------------------------|
| Census-based carbonate budgets | Gross framework calcium carbonate production | Biologically-produced CaCO <sub>3</sub> that contributes to surficial reef framework and is based on organism relative abundance and calcification rate (e.g. corals and CCA) | (15, 138-144)               |
| Census-based carbonate budgets | Bioerosion                                   | The biological removal of framework CaCO <sub>3</sub> through both physical (e.g. parrotfish, urchins, internal borers) and chemical (e.g. internal borers) processes         |                             |

|                                 |                                            |                                                                                                                                                                                       |               |
|---------------------------------|--------------------------------------------|---------------------------------------------------------------------------------------------------------------------------------------------------------------------------------------|---------------|
| Census-based carbonate budgets  | Net framework calcium carbonate production | The net change (increase or decrease) in biological produced framework $\text{CaCO}_3$ (over time) as a product of framework $\text{CaCO}_3$ production and bioerosion                |               |
| Hydrochemical carbonate budgets | Reef calcium carbonate production          | The precipitation of $\text{CaCO}_3$ (or $\text{Ca}_{1-x}\text{Mg}_x\text{CO}_3$ ) via biological or chemical means                                                                   | (145-147)     |
| Hydrochemical carbonate budgets | Dissolution                                | The transition of the solid phase back into its dissolved component which can be facilitated by chemical or biological means                                                          |               |
| Hydrochemical carbonate budgets | Net calcium carbonate production           | The sum of all calcification and dissolution processes (that can be measured by chemical means)                                                                                       |               |
| Sediment budgets                | Gross sediment production                  | The total amount of carbonate sediment produced either through direct sediment production (e.g. molluscs, forams etc.) or indirect sediment production (e.g. coral breakage, grazing) | (148-151)     |
| Sediment budgets                | Sediment dissolution                       | The rate of carbonate sediment loss through chemical means                                                                                                                            | (30, 50, 152) |

|                            |                         |                                                                                                                            |            |
|----------------------------|-------------------------|----------------------------------------------------------------------------------------------------------------------------|------------|
| Sediment budgets           | Net sediment production | The amount of carbonate sediment produced from direct and indirect sediment producers minus sediment loss from dissolution | (153, 154) |
| Sediment budgets           | Sediment transport      | The movement of sediment within the reef (re-distribution), off reef (export) and on to the reef (import)                  | (155-157)  |
| Carbonate budgets, generic | Physical erosion        | The removal of reef framework by physical forces such as wave action and strong current                                    | (158-160)  |
| Carbonate budgets, generic | Reef accretion          | The maximum potential rate of vertical reef growth and is the product of net (framework) calcium carbonate production      | (99)       |



125 **Dataset S1 Organism Responses (separate file).** Calculated response slopes and standard  
 126 deviations used to calculate impacts of ocean warming, acidification and their interaction on  
 127 corals and coralline algae.

128 **Dataset S2 Site Data (separate file).** Characteristics of each site used in our analysis.

129

130

### 131 SI References

132

- 133 1. M. Achlatis *et al.*, Sponge bioerosion on changing reefs: ocean warming poses  
 134 physiological constraints to the success of a photosymbiotic excavating sponge.  
 135 *Scientific Reports* **7**, 10705 (2017).
- 136 2. R. Albright, C. Langdon, Ocean acidification impacts multiple early life history  
 137 processes of the Caribbean coral *Porites astreoides*. *Global Change Biology* **17**, 2478-  
 138 2487 (2011).
- 139 3. R. Albright, B. Mason, M. Miller, C. Langdon, Ocean acidification compromises  
 140 recruitment success of the threatened Caribbean coral *Acropora palmata*. *Proceedings*  
 141 *of the National Academy of Sciences of the United States of America* **107**, 20400-  
 142 20404 (2010).
- 143 4. R. Albright, C. Langdon, K. R. N. Anthony, Dynamics of seawater carbonate  
 144 chemistry, production, and calcification of a coral reef flat, central Great Barrier Reef.  
 145 *Biogeosciences* **10**, 6747-6758 (2013).
- 146 5. R. Albright, J. Benthuyssen, N. Cantin, K. Caldeira, K. Anthony, Coral reef  
 147 metabolism and carbon chemistry dynamics of a coral reef flat. *Geophysical Research*  
 148 *Letters* **42**, 3980-3988 (2015).
- 149 6. K. D. Anderson, N. E. Cantin, S. F. Heron, C. Pisapia, M. S. Pratchett, Variation in  
 150 growth rates of branching corals along Australia's Great Barrier Reef. *Scientific*  
 151 *Reports* **7**, 2920 (2017).
- 152 7. H. Anlauf, L. D'Croze, A. O'Dea, A corrosive concoction: The combined effects of  
 153 ocean warming and acidification on the early growth of a stony coral are  
 154 multiplicative. *Journal of Experimental Marine Biology and Ecology* **397**, 13-20  
 155 (2011).
- 156 8. K. R. N. Anthony, D. I. Kline, G. Diaz-Pulido, S. Dove, O. Hoegh-Guldberg, Ocean  
 157 acidification causes bleaching and productivity loss in coral reef builders.  
 158 *Proceedings of the National Academy of Sciences* **105**, 17442-17446 (2008).
- 159 9. M. J. Atkinson, R. W. Grigg, Model of a coral reef ecosystem. *Coral Reefs* **3**, 13-22  
 160 (1984).
- 161 10. K. D. Bahr, P. L. Jokiel, K. u. S. Rodgers, Relative sensitivity of five Hawaiian coral  
 162 species to high temperature under high-pCO<sub>2</sub> conditions. *Coral Reefs* **35**, 729-738  
 163 (2016).
- 164 11. H. E. Bedwell-Ivers *et al.*, The role of in hospite zooxanthellae photophysiology and  
 165 reef chemistry on elevated pCO<sub>2</sub> effects in two branching Caribbean corals: *Acropora*  
 166 *cervicornis* and *Porites divaricata*. *ICES Journal of Marine Science* **74**, 1103-1112  
 167 (2016).
- 168 12. E. Béraud, F. Gevaert, C. Rottier, C. Ferrier-Pages, The response of the scleractinian  
 169 coral *Turbinaria reniformis* to thermal stress depends on the nitrogen status of the  
 170 coral holobiont. *Journal of Experimental Biology* **216**, 2665-2674 (2013).
- 171 13. T. Biscéré *et al.*, Responses of Two Scleractinian Corals to Cobalt Pollution and  
 172 Ocean Acidification. *PLOS ONE* **10**, e0122898 (2015).

- 173 14. H. V. Brien, M. O. Hoogenboom, S. A. Watson, Presence of competitors influences  
174 photosynthesis, but not growth, of the hard coral *Porites cylindrica* at elevated  
175 seawater CO<sub>2</sub>. *ICES Journal of Marine Science* **73**, 659-669 (2015).
- 176 15. N. K. Browne, S. G. Smithers, C. T. Perry, Spatial and temporal variations in turbidity  
177 on two inshore turbid reefs on the Great Barrier Reef, Australia. *Coral Reefs* **32**, 195-  
178 210 (2013).
- 179 16. K. D. Castillo, J. B. Ries, J. F. Bruno, I. T. Westfield, The reef-building coral  
180 *Siderastrea siderea* exhibits parabolic responses to ocean acidification and warming.  
181 *Proceedings of the Royal Society B: Biological Sciences* **281**, 20141856 (2014).
- 182 17. A. Chauvin, V. Denis, P. Cuet, Is the response of coral calcification to seawater  
183 acidification related to nutrient loading? *Coral Reefs* **30**, 911-923 (2011).
- 184 18. V. Chazottes, T. L. Campion-Alsumard, M. Peyrot-Clausade, Bioerosion rates on  
185 coral reefs: interactions between macroborers, microborers and grazers (Moorea,  
186 French Polynesia). *Palaeogeography, Palaeoclimatology, Palaeoecology* **113**, 189-  
187 198 (1995).
- 188 19. J. R. M. Chisholm, Calcification by crustose coralline algae on the northern Great  
189 Barrier Reef, Australia. *Limnology and Oceanography* **45**, 1476-1484 (2000).
- 190 20. S. Cohen, T. Krueger, M. Fine, Measuring coral calcification under ocean  
191 acidification: methodological considerations for the <sup>45</sup>Ca-uptake and total alkalinity  
192 anomaly technique. *PeerJ* **5**, e3749 (2017).
- 193 21. S. Comeau, R. C. Carpenter, P. J. Edmunds, Effects of feeding and light intensity on  
194 the response of the coral *Porites rus* to ocean acidification. *Marine Biology* **160**,  
195 1127-1134 (2013).
- 196 22. S. Comeau, P. J. Edmunds, N. B. Spindel, R. C. Carpenter, The responses of eight  
197 coral reef calcifiers to increasing partial pressure of CO<sub>2</sub> do not exhibit a tipping  
198 point. *Limnology and Oceanography* **58**, 388-398 (2013).
- 199 23. S. Comeau, R. C. Carpenter, P. J. Edmunds, Effects of irradiance on the response of  
200 the coral *Acropora pulchra* and the calcifying alga *Hydrolithon reinboldii* to  
201 temperature elevation and ocean acidification. *Journal of Experimental Marine*  
202 *Biology and Ecology* **453**, 28-35 (2014).
- 203 24. S. Comeau, P. J. Edmunds, N. B. Spindel, R. C. Carpenter, Fast coral reef calcifiers  
204 are more sensitive to ocean acidification in short-term laboratory incubations.  
205 *Limnology and Oceanography* **59**, 1081-1091 (2014).
- 206 25. S. Comeau *et al.*, Pacific-wide contrast highlights resistance of reef calcifiers to ocean  
207 acidification. *Proceedings of the Royal Society B-Biological Sciences* **281** (2014).
- 208 26. S. Comeau, R. C. Carpenter, C. A. Lantz, P. J. Edmunds, Ocean acidification  
209 accelerates dissolution of experimental coral reef communities. *Biogeosciences* **12**,  
210 365-372 (2015).
- 211 27. S. Comeau, R. C. Carpenter, C. A. Lantz, P. J. Edmunds, Parameterization of the  
212 response of calcification to temperature and pCO<sub>2</sub> in the coral *Acropora pulchra* and  
213 the alga *Lithophyllum kotschyannum*. *Coral Reefs*, 1-11 (2016).
- 214 28. C. E. Cornwall *et al.*, Resistance of corals and coralline algae to ocean acidification:  
215 physiological control of calcification under natural pH variability. *Proceedings of the*  
216 *Royal Society B: Biological Sciences* **285** (2018).
- 217 29. T. A. Courtney *et al.*, Comparing Chemistry and Census-Based Estimates of Net  
218 Ecosystem Calcification on a Rim Reef in Bermuda. **3** (2016).
- 219 30. T. Cyronak, I. R. Santos, B. D. Eyre, Permeable coral reef sediment dissolution driven  
220 by elevated pCO<sub>2</sub> and pore water advection. *Geophysical Research Letters* **40**, 4876-  
221 4881 (2013).

- 222 31. P. J. Davies, P. A. Hutchings, Initial colonization, erosion and accretion of coral  
223 substrate. *Coral Reefs* **2**, 27-35 (1983).
- 224 32. H. C. Barkley *et al.*, Coral macrobioerosion is accelerated by ocean acidification and  
225 nutrients. *Geology* **43**, 7-10 (2015).
- 226 33. T. M. DeCarlo *et al.*, Mass coral mortality under local amplification of 2 °C ocean  
227 warming. *Scientific Reports* **7**, 44586 (2017).
- 228 34. C. Doropoulos, S. Ward, G. Diaz-Pulido, O. Hoegh-Guldberg, P. J. Mumby, Ocean  
229 acidification reduces coral recruitment by disrupting intimate larval-algal settlement  
230 interactions. *Ecology Letters* **15**, 338-346 (2012).
- 231 35. C. Doropoulos, S. Ward, A. Marshall, G. Diaz-Pulido, P. J. Mumby, Interactions  
232 among chronic and acute impacts on coral recruits: The importance of size-escape  
233 thresholds. *Ecological Monographs* (2012).
- 234 36. E. J. Drenkard *et al.*, Calcification by juvenile corals under heterotrophy and elevated  
235 CO<sub>2</sub>. *Coral Reefs* **32**, 727-735 (2013).
- 236 37. A. M. Dufault, V. R. Cumbo, T. Y. Fan, P. J. Edmunds, Effects of diurnally  
237 oscillating pCO<sub>2</sub> on the calcification and survival of coral recruits. *Proceedings of the*  
238 *Royal Society B: Biological Sciences* **279**, 2951-2958 (2012).
- 239 38. A. M. Dufault *et al.*, The role of light in mediating the effects of ocean acidification  
240 on coral calcification. *Journal of Experimental Biology* **216**, 1570-1577 (2013).
- 241 39. E. N. Edinger *et al.*, Normal Coral Growth Rates on Dying Reefs: Are Coral Growth  
242 Rates Good Indicators of Reef Health? *Marine Pollution Bulletin* **40**, 404-425 (2000).
- 243 40. P. J. Edmunds, The effect of sub-lethal increases in temperature on the growth and  
244 population trajectories of three scleractinian corals on the southern Great Barrier Reef.  
245 *Oecologia* **146**, 350-364 (2005).
- 246 41. P. J. Edmunds, Zooplanktivory ameliorates the effects of ocean acidification on the  
247 reef coral *Porites* spp. *Limnology and Oceanography* **56**, 2402-2410 (2011).
- 248 42. P. J. Edmunds, A. Yarid, The effects of ocean acidification on wound repair in the  
249 coral *Porites* spp. *Journal of Experimental Marine Biology and Ecology* **486**, 98-104  
250 (2017).
- 251 43. P. J. Edmunds, V. Cumbo, T.-Y. Fan, Effects of temperature on the respiration of  
252 brooded larvae from tropical reef corals. *The Journal of Experimental Biology* **214**,  
253 2783 (2011).
- 254 44. P. J. Edmunds, D. Brown, V. Moriarty, Interactive effects of ocean acidification and  
255 temperature on two scleractinian corals from Moorea, French Polynesia. *Global*  
256 *Change Biology* **18**, 2173-2183 (2012).
- 257 45. I. C. Enochs *et al.*, Effects of light and elevated pCO<sub>2</sub> on the growth and  
258 photochemical efficiency of *Acropora cervicornis*. *Coral Reefs* **33**, 477-485 (2014).
- 259 46. I. C. Enochs *et al.*, Ocean acidification enhances the bioerosion of a common coral  
260 reef sponge: implications for the persistence of the Florida Reef Tract. *Bulletin of*  
261 *Marine Science* **91**, 271-290 (2015).
- 262 47. I. C. Enochs *et al.*, Elevated Colonization of Microborers at a Volcanically Acidified  
263 Coral Reef. *PLOS ONE* **11**, e0159818 (2016).
- 264 48. N. R. Evensen, P. J. Edmunds, Conspecific aggregations mitigate the effects of ocean  
265 acidification on calcification of the coral *Pocillopora verrucosa*. *The Journal of*  
266 *Experimental Biology* **220**, 1097 (2017).
- 267 49. N. R. Evensen, P. J. Edmunds, K. Sakai, Effects of pCO<sub>2</sub> on spatial competition  
268 between the corals *Montipora aequituberculata* and *Porites lutea*. *Marine Ecology*  
269 *Progress Series* **541**, 123-134 (2015).
- 270 50. B. D. Eyre *et al.*, Coral reefs will transition to net dissolving before end of century.  
271 *Science* **359**, 908-911 (2018).

- 272 51. J. L. Falter, R. J. Lowe, M. J. Atkinson, P. Cuët, Seasonal coupling and de-coupling  
273 of net calcification rates from coral reef metabolism and carbonate chemistry at  
274 Ningaloo Reef, Western Australia. *Journal of Geophysical Research: Oceans* **117**  
275 (2012).
- 276 52. J. K. H. Fang *et al.*, Sponge biomass and bioerosion rates increase under ocean  
277 warming and acidification. *Global Change Biology* **19**, 3581-3591 (2013).
- 278 53. T. Foster, J. A. Short, J. L. Falter, C. Ross, M. T. McCulloch, Reduced calcification in  
279 Western Australian corals during anomalously high summer water temperatures.  
280 *Journal of Experimental Marine Biology and Ecology* **461**, 133-143 (2014).
- 281 54. T. Foster, J. P. Gilmour, C. M. Chua, J. L. Falter, M. T. McCulloch, Effect of ocean  
282 warming and acidification on the early life stages of subtropical *Acropora spicifera*.  
283 *Coral Reefs* **34**, 1217-1226 (2015).
- 284 55. K. Gao, Y. Zheng, Combined effects of ocean acidification and solar UV radiation on  
285 photosynthesis, growth, pigmentation and calcification of the coralline alga *Corallina*  
286 *sessilis*. *Global Change Biology* **16**, 2388-2398 (2010).
- 287 56. A. G. Grottoli *et al.*, The cumulative impact of annual coral bleaching can turn some  
288 coral species winners into losers. *Global Change Biology* **20**, 3823-3833 (2014).
- 289 57. S. Hamylton, Will Coral Islands Maintain Their Growth over the Next Century? A  
290 Deterministic Model of Sediment Availability at Lady Elliot Island, Great Barrier  
291 Reef. *PLOS ONE* **9**, e94067 (2014).
- 292 58. K. D. Hoadley *et al.*, Physiological response to elevated temperature and pCO<sub>2</sub> varies  
293 across four Pacific coral species: Understanding the unique host+symbiont response.  
294 *Scientific Reports* **5**, 18371 (2015).
- 295 59. H. Huang *et al.*, Positive and negative responses of coral calcification to elevated  
296 pCO<sub>2</sub>: case studies of two coral species and the implications of their responses.  
297 *Marine Ecology Progress Series* **502**, 145-156 (2014).
- 298 60. F. Houlbrèque *et al.*, Effects of increased pCO<sub>2</sub> on zinc uptake and calcification in the  
299 tropical coral *Stylophora pistillata*. *Coral Reefs* **31**, 101-109 (2012).
- 300 61. F. Houlbrèque *et al.*, Ocean acidification reduces feeding rates in the scleractinian  
301 coral *Stylophora pistillata*. *Limnology and Oceanography* **60**, 89-99 (2015).
- 302 62. K. M. Horvath *et al.*, Next-century ocean acidification and warming both reduce  
303 calcification rate, but only acidification alters skeletal morphology of reef-building  
304 coral *Siderastrea siderea*. *Scientific Reports* **6**, 29613 (2016).
- 305 63. P. Hutchings, M. Peyrot-Clausade, A. Osnorno, Influence of land runoff on rates and  
306 agents of bioerosion of coral substrates. *Marine Pollution Bulletin* **51**, 438-447  
307 (2005).
- 308 64. A. Iguchi *et al.*, Effects of acidified seawater on coral calcification and symbiotic  
309 algae on the massive coral *Porites australiensis*. *Marine Environmental Research* **73**,  
310 32-36 (2012).
- 311 65. A. Iguchi *et al.*, Responses of calcification of massive and encrusting corals to past,  
312 present, and near-future ocean carbon dioxide concentrations. *Marine Pollution*  
313 *Bulletin* **89**, 348-355 (2014).
- 314 66. M. Inoue, R. Suwa, A. Suzuki, K. Sakai, H. Kawahata, Effects of seawater pH on  
315 growth and skeletal U/Ca ratios of *Acropora digitifera* coral polyps. *Geophysical*  
316 *Research Letters* **38** (2011).
- 317 67. M. D. Johnson, R. C. Carpenter, Ocean acidification and warming decrease  
318 calcification in the crustose coralline alga *Hydrolithon onkodes* and increase  
319 susceptibility to grazing. *Journal of Experimental Marine Biology and Ecology* **434-**  
320 **435**, 94-101 (2012).

- 321 68. M. D. Johnson, V. W. Moriarty, R. C. Carpenter, Acclimatization of the Crustose  
322 Coralline Alga *Porolithon onkodes* to Variable pCO<sub>2</sub>. *PLOS ONE* **9**, e87678 (2014).
- 323 69. M. D. Johnson, N. N. Price, J. E. Smith, Contrasting effects of ocean acidification on  
324 tropical fleshy and calcareous algae. *PeerJ* **2**, e411 (2014).
- 325 70. P. L. Jokiel *et al.*, Ocean acidification and calcifying reef organisms: a mesocosm  
326 investigation. *Coral Reefs* **27**, 473-483 (2008).
- 327 71. P. Kaniewska *et al.*, Major cellular and physiological impacts of ocean acidification  
328 on a reef building coral. *PLoS one* **7**, e34659 (2012).
- 329 72. A. Kato *et al.*, Negative effects of ocean acidification on two crustose coralline  
330 species using genetically homogeneous samples. *Marine Environmental Research* **94**,  
331 1-6 (2014).
- 332 73. J. Kavousi, J. D. Reimer, Y. Tanaka, T. Nakamura, Colony-specific investigations  
333 reveal highly variable responses among individual corals to ocean acidification and  
334 warming. *Marine Environmental Research* **109**, 9-20 (2015).
- 335 74. J. Kavousi *et al.*, Colony-specific calcification and mortality under ocean acidification  
336 in the branching coral *Montipora digitata*. *Marine Environmental Research* **119**, 161-  
337 165 (2016).
- 338 75. H. Kayanne *et al.*, Seasonal and bleaching-induced changes in coral reef metabolism  
339 and CO<sub>2</sub> flux. *Glob. Biogeochem. Cycles* **19** (2005).
- 340 76. W. E. Kiene, P. A. Hutchings, Bioerosion experiments at Lizard Island, Great Barrier  
341 Reef. *Coral Reefs* **13**, 91-98 (1994).
- 342 77. S. Krief *et al.*, Physiological and isotopic responses of scleractinian corals to ocean  
343 acidification. *Geochimica et Cosmo. Acta* **74**, 4988-5001 (2010).
- 344 78. D. A. Koweeck *et al.*, High-resolution physical and biogeochemical variability from a  
345 shallow back reef on Ofu, American Samoa: an end-member perspective. *Coral Reefs*  
346 **34**, 979-991 (2015).
- 347 79. D. Koweeck *et al.*, Environmental and ecological controls of coral community  
348 metabolism on Palmyra Atoll. *Coral Reefs* **34**, 339-351 (2015).
- 349 80. I. B. Kuffner, A. J. Andersson, P. L. Jokiel, K. S. Rodgers, F. T. MacKenzie,  
350 Decreased abundance of crustose coralline algae due to ocean acidification. *Nature*  
351 *Geoscience* **1**, 114-117 (2008).
- 352 81. C. A. Lantz, M. J. Atkinson, C. W. Winn, S. E. Kahng, Dissolved inorganic carbon  
353 and total alkalinity of a Hawaiian fringing reef: chemical techniques for monitoring  
354 the effects of ocean acidification on coral reefs. *Coral Reefs* **33**, 105-115 (2014).
- 355 82. C. A. Lantz, K. G. Schulz, L. Stoltenberg, B. D. Eyre, The short-term combined  
356 effects of temperature and organic matter enrichment on permeable coral reef  
357 carbonate sediment metabolism and dissolution. *Biogeosciences* **14**, 5377-5391  
358 (2017).
- 359 83. C. A. Lantz, R. C. Carpenter, P. J. Edmunds, Calcium carbonate (CaCO<sub>3</sub>) sediment  
360 dissolution under elevated concentrations of carbon dioxide (CO<sub>2</sub>) and nitrate  
361 (NO<sub>3</sub><sup>-</sup>). *Journal of Experimental Marine Biology and Ecology* **495**, 48-56 (2017).
- 362 84. C. A. Lantz, K. G. Schulz, B. D. Eyre, The effect of warming and benthic community  
363 acclimation on coral reef carbonate sediment metabolism and dissolution. *Coral Reefs*  
364 **38**, 149-163 (2019).
- 365 85. E. A. Lenz, P. J. Edmunds, Branches and plates of the morphologically plastic coral  
366 *Porites rus* are insensitive to ocean acidification and warming. *Journal of*  
367 *Experimental Marine Biology and Ecology* **486**, 188-194 (2017).
- 368 86. S. J. Levas, A. G. Grottooli, A. Hughes, C. L. Osburn, Y. Matsui, Physiological and  
369 Biogeochemical Traits of Bleaching and Recovery in the Mounding Species of Coral

- 370 *Porites lobata*: Implications for Resilience in Mounding Corals. *PLOS ONE* **8**,  
 371 e63267 (2013).
- 372 87. D. P. Manzello *et al.*, Poorly cemented coral reefs of the eastern tropical Pacific:  
 373 Possible insights into reef development in a high-CO<sub>2</sub> world. *Proceedings of the*  
 374 *National Academy of Sciences* **105**, 10450 (2008).
- 375 88. F. Marubini, M. J. Atkinson, Effects of lowered pH and elevated nitrate on coral  
 376 calcification. *Marine Ecology Progress Series* **188**, 117-121 (1999).
- 377 89. F. Marubini, C. Ferrier-Pagés, J. P. Cuif, Suppression of skeletal growth in  
 378 scleractinian corals by decreasing ambient carbonate-ion concentration: a cross-family  
 379 comparison. *Proceedings of the Royal Society B-Biological Sciences* **270**, 179-184  
 380 (2003).
- 381 90. N. Muehlehner, & Edmunds, P. J. (2008) Effects of ocean acidification and increased  
 382 temperature on skeletal growth of two scleractinian corals, *Pocillopora meandrina*  
 383 and *Porites rus*. in *Proceedings of the 11<sup>th</sup> International Coral Reef Symposium* (Ft.  
 384 Lauderdale, Florida ), pp 57-61.
- 385 91. T. Nakamura, T. Nakamori, Estimation of photosynthesis and calcification rates at a  
 386 fringing reef by accounting for diurnal variations and the zonation of coral reef  
 387 communities on reef flat and slope: a case study for the Shiraho reef, Ishigaki Island,  
 388 southwest Japan. *Coral Reefs* **28**, 229-250 (2009).
- 389 92. T. Nakamura, A. Iguchi, A. Suzuki, K. Sakai, Y. Nojiri, Effects of acidified seawater  
 390 on calcification, photosynthetic efficiencies and the recovery processes from strong  
 391 light exposure in the coral *Stylophora pistillata*. *Marine Ecology* **38**, e12444 (2017).
- 392 93. S. Ohde, R. van Woesik, Carbon dioxide flux and metabolic processes of a coral reef,  
 393 Okinawa. *Bulletin of Marine Science* **65**, 559-576 (1999).
- 394 94. S. Ohki *et al.*, Calcification responses of symbiotic and aposymbiotic corals to near-  
 395 future levels of ocean acidification. *Biogeosciences* **10**, 6807-6814 (2013).
- 396 95. R. R. Okazaki *et al.*, Species-specific responses to climate change and community  
 397 composition determine future calcification rates of Florida Keys reefs. *Global Change*  
 398 *Biology* **23**, 1023-1035 (2017).
- 399 96. A. Ordoñez, C. Doropoulos, G. Diaz-Pulido, Effects of Ocean Acidification on  
 400 Population Dynamics and Community Structure of Crustose Coralline Algae. *The*  
 401 *Biological Bulletin* **226**, 255-268 (2014).
- 402 97. N. Pari, M. Peyrot-Clausade, P. A. Hutchings, Bioerosion of experimental substrates  
 403 on high islands and atoll lagoons (French Polynesia) during 5 years of exposure.  
 404 *Journal of Experimental Marine Biology and Ecology* **276**, 109-127 (2002).
- 405 98. D. I. Perez *et al.*, Primary Production and Calcification Rates of Algae-Dominated  
 406 Reef Flat and Seagrass Communities. *Journal of Geophysical Research:*  
 407 *Biogeosciences* **123**, 2362-2375 (2018).
- 408 99. C. T. Perry *et al.*, Loss of coral reef growth capacity to track future increases in sea  
 409 level. *Nature* **558**, 396-400 (2018).
- 410 100. D. T. Pettay, D. C. Wham, R. T. Smith, R. Iglesias-Prieto, T. C. LaJeunesse,  
 411 Microbial invasion of the Caribbean by an Indo-Pacific coral zooxanthella.  
 412 *Proceedings of the National Academy of Sciences* **112**, 7513 (2015).
- 413 101. H. M. Putnam, P. J. Edmunds, The physiological response of reef corals to diel  
 414 fluctuations in seawater temperature. *Journal of Experimental Marine Biology and*  
 415 *Ecology* **396**, 216-223 (2011).
- 416 102. D. A. Renegar, B. M. Riegl, Effect of nutrient enrichment and elevated CO<sub>2</sub> partial  
 417 pressure on growth rate of Atlantic scleractinian coral *Acropora cervicornis*. *Mar.*  
 418 *Ecol. Prog. Ser.* **293**, 69-75 (2005).

- 419 103. C. Reyes-Nivia, G. Diaz-Pulido, D. Kline, O.-H. Guldberg, S. Dove, Ocean  
420 acidification and warming scenarios increase microbioerosion of coral skeletons.  
421 *Global Change Biology* **19**, 1919-1929 (2013).
- 422 104. C. Reyes-Nivia, G. Diaz-Pulido, S. Dove, Relative roles of endolithic algae and  
423 carbonate chemistry variability in the skeletal dissolution of crustose coralline algae.  
424 *Biogeosciences* **11**, 4615–4626 (2014).
- 425 105. S. Reynaud *et al.*, Interacting effects of CO<sub>2</sub> partial pressure and temperature on  
426 photosynthesis and calcification in a scleractinian coral. *Global Change Biology* **9**,  
427 1660-1668 (2003).
- 428 106. S. Reynaud *et al.*, Light and temperature effects on Sr/Ca and Mg/Ca ratios in the  
429 scleractinian coral *Acropora* sp. *Geochimica Et Cosmochimica Acta* **71**, 354-362  
430 (2007).
- 431 107. J. B. Ries, A. L. Cohen, D. C. McCorkle, Marine calcifiers exhibit mixed responses to  
432 CO<sub>2</sub>-induced ocean acidification. *Geology* **37**, 1131-1134 (2009).
- 433 108. L. J. Rodrigues, A. G. Grottoli, Calcification rate and the stable carbon, oxygen, and  
434 nitrogen isotopes in the skeleton, host tissue, and zooxanthellae of bleached and  
435 recovering Hawaiian corals. *Geochimica et Cosmochimica Acta* **70**, 2781-2789  
436 (2006).
- 437 109. V. Schoepf *et al.*, Coral energy reserves and calcification in a high-CO<sub>2</sub> world at two  
438 temperatures. *PloS one* **8**, e75049 (2013).
- 439 110. E. C. Shaw, B. I. McNeil, B. Tilbrook, Impacts of ocean acidification in naturally  
440 variable coral reef flat ecosystems. *Journal of Geophysical Research* **117**, C3038,  
441 doi:3010.1029/2011JC007655 (2012).
- 442 111. E. C. Shaw, S. R. Phinn, B. Tilbrook, A. Steven, Natural in situ relationships suggest  
443 coral reef calcium carbonate production will decline with ocean acidification.  
444 *Limnology and Oceanography* **60**, 777-788 (2015).
- 445 112. E. C. Shaw, R. C. Carpenter, C. A. Lantz, P. J. Edmunds, Intraspecific variability in  
446 the response to ocean warming and acidification in the scleractinian coral *Acropora*  
447 *pulchra*. *Marine Biology* **163**, 210 (2016).
- 448 113. J. Short, G. A. Kendrick, J. Falter, M. T. McCulloch, Interactions between  
449 filamentous turf algae and coralline algae are modified under ocean acidification.  
450 *Journal of Experimental Marine Biology and Ecology* **456**, 70-77 (2014).
- 451 114. N. J. Silbiger, M. J. Donahue, Secondary calcification and dissolution respond  
452 differently to future ocean conditions. *Biogeosciences* **12**, 567-578 (2015).
- 453 115. J. Silverman *et al.*, Carbon turnover rates in the One Tree Island reef: A 40-year  
454 perspective. *Journal of Geophysical Research: Biogeosciences* **117** (2012).
- 455 116. J. Silverman *et al.*, Community calcification in Lizard Island, Great Barrier Reef: A  
456 33year perspective. *Geochimica et Cosmochimica Acta* **144**, 72-81 (2014).
- 457 117. S. V. Smith, The Houtman Abrolhos Islands: Carbon metabolism of coral reefs at  
458 high latitude. *Limnology and Oceanography* **26**, 612-621 (1981).
- 459 118. L. W. Smith, D. Barshis, C. Birkeland, Phenotypic plasticity for skeletal growth,  
460 density and calcification of *Porites lobata* in response to habitat type. *Coral Reefs* **26**,  
461 559-567 (2007).
- 462 119. A. D. Stubler, B. J. Peterson, Ocean acidification accelerates net calcium carbonate  
463 loss in a coral rubble community. *Coral Reefs* **35**, 795-803 (2016).
- 464 120. A. D. Stubler, B. T. Furman, B. J. Peterson, Sponge erosion under acidification and  
465 warming scenarios: differential impacts on living and dead coral. *Global Change*  
466 *Biology* **21**, 4006-4020 (2015).

- 467 121. A. Suzuki, T. Nakamori, H. Kayanne, The mechanism of production enhancement in  
 468 coral reef carbonate systems: model and empirical results. *Sedimentary Geology* **99**,  
 469 259-280 (1995).
- 470 122. A. Takahashi, H. Kurihara, Ocean acidification does not affect the physiology of the  
 471 tropical coral *Acropora digitifera* during a 5-week experiment. *Coral Reefs* **32**, 305-  
 472 314 (2013).
- 473 123. Y. Tanaka *et al.*, Nutrient availability affects the response of juvenile corals and the  
 474 endosymbionts to ocean acidification. *Limnology and Oceanography* **59**, 1468-1476  
 475 (2014).
- 476 124. Y. Tanaka, A. Suzuki, K. Sakai, Effects of elevated seawater temperature and  
 477 phosphate enrichment on the crustose coralline alga *Porolithon onkodes*  
 478 (Rhodophyta). *Phycological Research* **65**, 51-57 (2017).
- 479 125. E. K. Towle, I. C. Enochs, C. Langdon, Threatened Caribbean Coral Is Able to  
 480 Mitigate the Adverse Effects of Ocean Acidification on Calcification by Increasing  
 481 Feeding Rate. *PloS one* **10** (2015).
- 482 126. E. K. Towle, A. C. Baker, C. Langdon, Preconditioning to high CO<sub>2</sub> exacerbates the  
 483 response of the Caribbean branching coral *Porites porites* to high temperature stress.  
 484 *Marine Ecology Progress Series* **546**, 75-84 (2016).
- 485 127. A. Tribollet, G. Decherf, P. Hutchings, M. Peyrot-Clausade, Large-scale spatial  
 486 variability in bioerosion of experimental coral substrates on the Great Barrier Reef  
 487 (Australia): importance of microborers. *Coral Reefs* **21**, 424-432 (2002).
- 488 128. A. Tribollet, S. Golubic, Cross-shelf differences in the pattern and pace of bioerosion  
 489 of experimental carbonate substrates exposed for 3 years on the northern Great Barrier  
 490 Reef, Australia. *Coral Reefs* **24**, 422-434 (2005).
- 491 129. A. Tribollet, C. Godinot, M. Atkinson, C. Langdon, Effects of elevated pCO<sub>2</sub> on  
 492 dissolution of coral carbonates by microbial euendoliths. *Global Biogeochemical*  
 493 *Cycles* **23** (2009).
- 494 130. D. Trnovsky, L. Stoltenberg, T. Cyronak, B. D. Eyre, Antagonistic Effects of Ocean  
 495 Acidification and Rising Sea Surface Temperature on the Dissolution of Coral Reef  
 496 Carbonate Sediments. *Frontiers in Marine Science* **3** (2016).
- 497 131. R. M. Vásquez-Elizondo, S. Enríquez, Coralline algal physiology is more adversely  
 498 affected by elevated temperature than reduced pH. *Scientific Reports* **6**, 19030 (2016).
- 499 132. A. A. Venn *et al.*, Impact of seawater acidification on pH at the tissue-skeleton  
 500 interface and calcification in reef corals. *Proceedings of the National Academy of*  
 501 *Sciences of the United States of America* **110**, 1634-1639 (2013).
- 502 133. N. Vogel, F. W. Meyer, C. Wild, S. Uthicke, Decreased light availability can amplify  
 503 negative impacts of ocean acidification on calcifying coral reef organisms. *Marine*  
 504 *Ecology Progress Series* **521**, 49-61 (2015).
- 505 134. N. Vogel *et al.*, Interactive effects of ocean acidification and warming on coral reef  
 506 associated epilithic algal communities under past, present-day and future ocean  
 507 conditions. *Coral Reefs* **35**, 715-728 (2016).
- 508 135. A. E. Webb *et al.*, Combined Effects of Experimental Acidification and  
 509 Eutrophication on Reef Sponge Bioerosion Rates. *Frontiers in Marine Science* **4**  
 510 (2017).
- 511 136. T. Wijgerde, C. I. F. Silva, V. Scherders, J. van Bleijswijk, R. Osinga, Coral  
 512 calcification under daily oxygen saturation and pH dynamics reveals the important  
 513 role of oxygen. *Biology Open* **3**, 489-493 (2014).
- 514 137. M. Wisshak, C. H. L. Schönberg, A. Form, A. Freiwald, Ocean Acidification  
 515 Accelerates Reef Bioerosion. *PLOS ONE* **7**, e45124 (2012).



- 516 138. D. Hubbard, A. I. Miller, D. Scaturro, Production and Cycling of Calcium Carbonate  
517 in a Shelf-Edge Reef System (St. Croix, U.S. Virgin Islands): Applications to the  
518 Nature of Reef Systems in the Fossil Record. *Journal of Sedimentary Research* **60**,  
519 335-360 (1990).
- 520 139. C. W. Stearn, T. P. Scoffin, W. Martindale, Calcium Carbonate Budget of a Fringing  
521 Reef on the West Coast of Barbados Part I&#8212;Zonation and Productivity. *Bulletin*  
522 *of Marine Science* **27**, 479-510 (1977).
- 523 140. C. M. Eakin, A tale of two Enso Events: carbonate budgets and the influence of two  
524 warming disturbances and intervening variability, Uva Island, Panama. *Bulletin of*  
525 *Marine Science* **69**, 171-186 (2001).
- 526 141. D. E. Hart, P. S. Kench, Carbonate production of an emergent reef platform, Warraber  
527 Island, Torres Strait, Australia. *Coral Reefs* **26**, 53-68 (2007).
- 528 142. J. Mallela, C. T. Perry, Calcium carbonate budgets for two coral reefs affected by  
529 different terrestrial runoff regimes, Rio Bueno, Jamaica. *Coral Reefs* **26**, 129-145  
530 (2007).
- 531 143. C. T. Perry *et al.*, Caribbean-wide decline in carbonate production threatens coral reef  
532 growth. *Nature Communications* **4**, 1402 (2013).
- 533 144. K. M. Morgan, P. S. Kench, Carbonate production rates of encruster communities on  
534 a lagoonal patch reef: Vabbinfaru reef platform, Maldives. *Marine and Freshwater*  
535 *Research* **65**, 720-726 (2014).
- 536 145. S. V. SMITH, D. W. KINSEY, Calcium Carbonate Production, Coral Reef Growth,  
537 and Sea Level Change. *Science* **194**, 937-939 (1976).
- 538 146. D. W. Kinsey, P. J. Davies, "Chapter 2.5 Carbon Turnover, Calcification and Growth  
539 in Coral Reefs" in *Studies in Environmental Science*, P. A. Trudinger, D. J. Swaine,  
540 Eds. (Elsevier, 1979), vol. 3, pp. 131-162.
- 541 147. T. Cyronak *et al.*, Taking the metabolic pulse of the world's coral reefs. *PLOS ONE*  
542 **13**, e0190872 (2018).
- 543 148. P. H. Muller, Sediment production and population biology of the benthic foraminifer  
544 *Amphistegina madagascariensis* 1,2. *Limnology and Oceanography* **19**, 802-809  
545 (1974).
- 546 149. P. Hallock, Production of carbonate sediments by selected large benthic foraminifera  
547 on two Pacific coral reefs. *Journal of Sedimentary Research* **51**, 467-474 (1981).
- 548 150. J. L. Dawson, S. Smithers, Carbonate Sediment Production, Transport, and Supply To  
549 A Coral Cay At Raine Reef, Northern Great Barrier Reef, Australia: A Facies  
550 Approach. *Journal of Sedimentary Research* **84**, 1120-1138 (2014).
- 551 151. C. T. Perry, K. M. Morgan, M. A. Salter, Sediment generation by *Halimeda* on atoll  
552 interior coral reefs of the southern Maldives: A census-based approach for estimating  
553 carbonate production by calcareous green algae. *Sedimentary Geology* **346**, 17-24  
554 (2016).
- 555 152. B. D. Eyre, A. J. Andersson, T. Cyronak, Benthic coral reef calcium carbonate  
556 dissolution in an acidifying ocean. *Nature Climate Change* **4**, 969 (2014).
- 557 153. J. N. Harney, P. Hallock, C. Fletcher, B. Richmond, Standing crop and sediment  
558 production of reef-dwelling foraminifera on O'ahu, Hawai'i. *Pacific Science* **53**, 61-73  
559 (1999).
- 560 154. K. M. Morgan (2014) A calcium carbonate budget of a Maldivian reef platform.  
561 (University of Auckland).
- 562 155. P. S. Kench, R. F. McLean, Hydraulic characteristics of bioclastic deposits: new  
563 possibilities for environmental interpretation using settling velocity fractions.  
564 *Sedimentology* **43**, 561-570 (1996).

- 565 156. A. W. M. Pomeroy *et al.*, Spectral wave-driven sediment transport across a fringing  
566 reef. *Coastal Engineering* **98**, 78-94 (2015).
- 567 157. M. V. W. Cuttler, J. E. Hansen, R. J. Lowe, E. J. F. Drost, Response of a fringing reef  
568 coastline to the direct impact of a tropical cyclone. *Limnology and Oceanography*  
569 *Letters* **3**, 31-38 (2018).
- 570 158. H. H. Roberts, P. A. Wilson, A. Lugo-Fernández, Biologic and geologic responses to  
571 physical processes: examples from modern reef systems of the Caribbean-Atlantic  
572 region. *Continental Shelf Research* **12**, 809-834 (1992).
- 573 159. R. W. Brander, P. S. Kench, D. Hart, Spatial and temporal variations in wave  
574 characteristics across a reef platform, Warraber Island, Torres Strait, Australia.  
575 *Marine Geology* **207**, 169-184 (2004).
- 576 160. J. S. Madin, S. R. Connolly, Ecological consequences of major hydrodynamic  
577 disturbances on coral reefs. *Nature* **444**, 477-480 (2006).

578
